# Supplementary material
Source: Springer Nature journal article supplement (https://www.springermedizin.de/resource/supplementary/13048_2012_109_MOESM5_ESM.pdf/9664928)

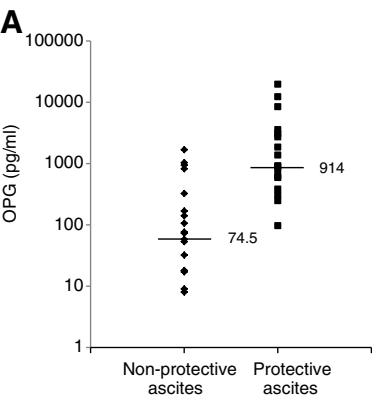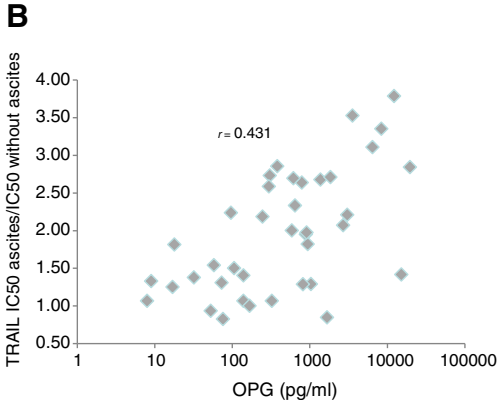

Supplement: MOESM5 [file 9664928]
